# Supplementary material
Source: PubMed Central journal article supplement (PMC3683605)
Supplement: NIHMS52975-supplement-Supp_Info.pdf [file NIHMS52975-supplement-Supp_Info.pdf]

**Reduced dosage of *ERF* causes complex craniosynostosis in humans and mice, and links ERK1/2 signaling to regulation of osteogenesis**

Stephen R F Twigg<sup>1</sup>, Elena Vorgia<sup>2,3,16</sup>, Simon J McGowan<sup>4,16</sup>, Ioanna Peraki<sup>2,3,16</sup>, Aimée L Fenwick<sup>1,16</sup>, Vikram P Sharma<sup>1,5</sup>, Maryline Allegra<sup>2</sup>, Andreas Zaragkoulias<sup>3</sup>, Elham Sadighi Akha<sup>6</sup>, Samantha J L Knight<sup>6</sup>, Helen Lord<sup>7</sup>, Tracy Lester<sup>7</sup>, Louise Izatt<sup>8</sup>, Anne K Lampe<sup>9</sup>, Shehla N Mohammed<sup>8</sup>, Fiona J Stewart<sup>10</sup>, Alain Verloes<sup>11</sup>, Louise C Wilson<sup>12</sup>, Chris Healy<sup>13</sup>, Paul T Sharpe<sup>13</sup>, Peter Hammond<sup>14</sup>, Jim Hughes<sup>15</sup>, Stephen Taylor<sup>4</sup>, David Johnson<sup>5</sup>, Steven A Wall<sup>5</sup>, George Mavrothalassitis<sup>2,3</sup>, Andrew O M Wilkie<sup>1,5</sup>

<sup>1</sup>Clinical Genetics Group, Weatherall Institute of Molecular Medicine, University of Oxford, Oxford, UK. <sup>2</sup>Institute of Molecular Biology and Biotechnology, Foundation for Research and Technology-Hellas, University of Crete and Heraklion, Crete, Greece. <sup>3</sup>School of Medicine, University of Crete and Heraklion, Crete, Greece. <sup>4</sup>Computational Biology Research Group, Weatherall Institute of Molecular Medicine, University of Oxford, Oxford, UK. <sup>5</sup>Craniofacial Unit, Oxford University Hospitals NHS Trust, Oxford, UK. <sup>6</sup>NIHR Biomedical Research Centre, Oxford and Wellcome Trust Centre for Human Genetics, University of Oxford, Oxford, UK. <sup>7</sup>Molecular Genetics Laboratory, Oxford University Hospitals NHS Trust, Oxford, UK. <sup>8</sup>Clinical Genetics, Guy's and St Thomas' NHS Foundation Trust, London, UK. <sup>9</sup>South East of Scotland Clinical Genetics Service, NHS Lothian, Edinburgh, UK. <sup>10</sup>Northern Ireland Regional Genetics Service, Belfast City Hospital, Belfast, UK. <sup>11</sup>Département de Génétique, APHP - Hôpital Robert Debré, Paris, France. <sup>12</sup>North East Thames Regional Genetics Service, Great Ormond Street Hospital for Children NHS Trust, London, UK. <sup>13</sup>Department of Craniofacial

Development and Stem Cell Biology, Dental Institute, King's College London, London, UK. <sup>14</sup>Molecular Medicine Unit, UCL Institute of Child Health, London, UK. <sup>15</sup>MRC Molecular Haematology Unit, Weatherall Institute of Molecular Medicine, University of Oxford, Oxford, UK. <sup>16</sup>These authors contributed equally to the work. Correspondence should be addressed to G.M. (mavro@imbb.forth.gr) or A.O.M.W. (awilkie@hammer.imm.ox.ac.uk).

### **Supplementary Movies 1-6**

Animated morphs of faces of 14 *ERF* mutation-positive individuals from Families 1, 4, 6, 8, 10 and 11 are shown in Movies 1-6, respectively. The portrait views highlight varying degrees of hypertelorism throughout the cohort. Significant lateral/bi-temporal expansion is also seen in probands of Families 1 (IV-2), 6 (III-1) and 10 (II-1). Shortening and/or vertical displacement of the nose is evident in families 1, 4 and 10. The profile animations of both children in Family 1 (IV-1 and IV-2) and the proband in Family 4 (III-1) emphasize the co-ordination of this nasal displacement with posterior displacement of the lateral periorbit. The three generations of Family 1 demonstrate consistent alterations in orbit depth and shape, as do members of Families 11 (affected mother II-2 and maternal uncle II-3) and 6 (proband IV-2 and affected father III-2). Malar flattening occurs in families 6, 8 and 11, but not in all cases.

**Supplementary Table 1. Non-synonymous variants identified by exome sequencing of individual IV-1 in Family 1**

| Chr  | Position  | Gene            | Variant | Coding | Gene_description                                                                                                                                                                                                                            |
|------|-----------|-----------------|---------|--------|---------------------------------------------------------------------------------------------------------------------------------------------------------------------------------------------------------------------------------------------|
| chr1 | 145587388 | ENSG00000186364 | G > A   | T > I  | nudix (nucleoside diphosphate linked moiety X)-type motif 17                                                                                                                                                                                |
| chr1 | 150679247 | ENSG00000143452 | C > T   | G > S  | HORMA domain containing 1                                                                                                                                                                                                                   |
| chr1 | 151110510 | ENSG00000143434 | G > A   | P > S  | sema domain, transmembrane domain (TM), and cytoplasmic domain, (semaphorin) 6C                                                                                                                                                             |
| chr1 | 155408686 | ENSG00000116539 | T > A   | S > C  | ash1 (absent, small, or homeotic)-like (Drosophila)                                                                                                                                                                                         |
| chr1 | 155903528 | ENSG00000132680 | C > T   | A > T  | KIAA0907                                                                                                                                                                                                                                    |
| chr1 | 156642155 | ENSG00000132688 | C > G   | K > N  | nestin                                                                                                                                                                                                                                      |
| chr1 | 161071849 | ENSG00000143256 | T > A   | N > Y  | prefoldin subunit 2                                                                                                                                                                                                                         |
| chr1 | 230907829 | ENSG00000135773 | G > A   | G > R  | calpain 9                                                                                                                                                                                                                                   |
| chr1 | 234744889 | ENSG00000168264 | G > A   | P > S  | interferon regulatory factor 2 binding protein 2                                                                                                                                                                                            |
| chr2 | 38956836  | ENSG00000143891 | C > G   | A > G  | galactose mutarotase (aldose 1-epimerase)                                                                                                                                                                                                   |
| chr2 | 216257711 | ENSG00000115414 | C > T   | V > I  | fibronectin 1                                                                                                                                                                                                                               |
| chr2 | 219878668 | ENSG00000181378 | T > C   | D > G  | coiled-coil domain containing 108                                                                                                                                                                                                           |
| chr2 | 220353297 | ENSG00000072195 | C > T   | R > W  | SPEG complex locus                                                                                                                                                                                                                          |
| chr3 | 121416813 | ENSG00000173230 | G > A   | L > F  | golgin B1, golgi integral membrane protein                                                                                                                                                                                                  |
| chr3 | 132405152 | ENSG00000113971 | C > T   | R > Q  | nephronophthisis 3 (adolescent)                                                                                                                                                                                                             |
| chr3 | 132441046 | ENSG00000113971 | C > T   | A > T  | nephronophthisis 3 (adolescent)                                                                                                                                                                                                             |
| chr4 | 106863842 | ENSG00000168743 | C > T   | P > L  | nephronectin                                                                                                                                                                                                                                |
| chr4 | 126412558 | ENSG00000196159 | A > G   | M > V  | FAT tumor suppressor homolog 4 (Drosophila)                                                                                                                                                                                                 |
| chr4 | 140625183 | ENSG00000085871 | C > T   | R > *  | microsomal glutathione S-transferase 2                                                                                                                                                                                                      |
| chr4 | 166416765 | ENSG00000109472 | C > T   | A > V  | carboxypeptidase E                                                                                                                                                                                                                          |
| chr4 | 177089839 | ENSG00000150627 | C > G   | L > V  | WD repeat domain 17                                                                                                                                                                                                                         |
| chr5 | 55466627  | ENSG00000164512 | A > C   | W > G  | ankyrin repeat domain 55                                                                                                                                                                                                                    |
|      |           |                 |         |        | Complement C4-A Precursor (Acidic complement C4)(C3 and PZP-like alpha-2-macroglobulin domain-containing protein 2) [Contains Complement C4 beta chain;Complement C4-A alpha chain;C4a anaphylatoxin;C4b-A;C4d-A;Complement C4 gamma chain] |
| chr6 | 31960890  | ENSG00000244731 | A > G   | T > A  |                                                                                                                                                                                                                                             |
| chr6 | 31993628  | ENSG00000224389 | A > G   | T > A  | complement component 4B (Chido blood group) transporter 1, ATP-binding cassette, sub-family B (MDR/TAP)                                                                                                                                     |
| chr6 | 32821022  | ENSG00000168394 | A > G   | L > P  |                                                                                                                                                                                                                                             |
| chr6 | 46803249  | ENSG00000112818 | G > A   | G > S  | meprin A, alpha (PABA peptide hydrolase)                                                                                                                                                                                                    |
| chr6 | 137323081 | ENSG0000016402  | A > G   | S > P  | interleukin 20 receptor, alpha                                                                                                                                                                                                              |
| chr6 | 160468304 | ENSG00000197081 | C > T   | P > L  | insulin-like growth factor 2 receptor                                                                                                                                                                                                       |
| chr6 | 169621600 | ENSG00000186340 | G > A   | P > L  | thrombospondin 2                                                                                                                                                                                                                            |
| chr7 | 73119489  | ENSG00000106089 | T > C   | K > E  | syntaxin 1A (brain)                                                                                                                                                                                                                         |
| chr7 | 92098864  | ENSG00000242950 | G > A   | R > C  | endogenous retroviral family W, env(C7), member 1                                                                                                                                                                                           |
| chr7 | 92763720  | ENSG00000177409 | G > A   | A > V  | sterile alpha motif domain containing 9-like                                                                                                                                                                                                |
| chr7 | 102223282 | ENSG00000105808 | T > C   | H > R  | RAS p21 protein activator 4                                                                                                                                                                                                                 |
| chr7 | 103292112 | ENSG00000189056 | T > G   | S > R  | reelin                                                                                                                                                                                                                                      |
| chr7 | 107800823 | ENSG00000091129 | T > A   | K > M  | neuronal cell adhesion molecule                                                                                                                                                                                                             |
| chr7 | 127235688 | ENSG00000106328 | C > T   | R > W  | fascin homolog 3, actin-bundling protein,                                                                                                                                                                                                   |

|       |           |                 |       |       |                                                                                          |
|-------|-----------|-----------------|-------|-------|------------------------------------------------------------------------------------------|
| chr7  | 139756914 | ENSG00000059378 | A > C | S > A | testicular (Strongylocentrotus purpuratus)                                               |
| chr8  | 10464616  | ENSG00000183638 | G > A | T > M | poly (ADP-ribose) polymerase family, member 12                                           |
| chr8  | 72977723  | ENSG00000104321 | G > A | A > V | retinitis pigmentosa 1-like 1                                                            |
| chr8  | 73921195  | ENSG00000147601 | A > G | E > G | transient receptor potential cation channel, subfamily A, member 1                       |
| chr9  | 116187302 | ENSG00000157653 | C > G | P > A | telomeric repeat binding factor (NIMA-interacting) 1                                     |
| chr9  | 116191205 | ENSG00000157653 | A > C | N > T | Uncharacterized protein C9orf43                                                          |
| chr9  | 124526082 | ENSG00000136848 | G > A | A > T | Uncharacterized protein C9orf43                                                          |
| chr9  | 125512943 | ENSG00000171459 | C > T | R > W | DAB2 interacting protein                                                                 |
| chr9  | 130167270 | ENSG00000136856 | G > A | G > S | olfactory receptor, family 1, subfamily L, member 6                                      |
| chr9  | 130886050 | ENSG00000148334 | C > G | G > A | solute carrier family 2 (facilitated glucose transporter), member 8                      |
| chr10 | 23270355  | ENSG00000165309 | G > A | A > T | prostaglandin E synthase 2                                                               |
| chr10 | 33017899  | ENSG00000150076 | T > C | I > T | armadillo repeat containing 3                                                            |
| chr10 | 133784238 | ENSG00000176171 | G > A | T > M | Uncharacterized protein C10orf68                                                         |
| chr10 | 135085954 | ENSG00000151651 | G > A | R > W | BCL2/adenovirus E1B 19kDa interacting protein 3                                          |
| chr11 | 224194    | ENSG00000142082 | C > T | G > S | ADAM metalloproteinase domain 8                                                          |
| chr11 | 376331    | ENSG00000182272 | T > A | F > Y | sirtuin (silent mating type information regulation 2 homolog) 3 ( <i>S. cerevisiae</i> ) |
| chr11 | 700653    | ENSG00000177042 | G > A | D > N | beta-1,4-N-acetyl-galactosaminyl transferase 4                                           |
| chr11 | 5878836   | ENSG00000183269 | T > A | I > F | transmembrane protein 80                                                                 |
| chr11 | 6459615   | ENSG00000110169 | C > T | C > Y | olfactory receptor, family 52, subfamily E, member 8                                     |
| chr11 | 22848804  | ENSG00000198168 | T > G | K > N | hemopexin                                                                                |
| chr11 | 25098911  | ENSG00000187398 | C > T | P > S | small VCP/p97-interacting protein                                                        |
| chr11 | 46917501  | ENSG00000134569 | G > A | R > W | leucine zipper protein 2                                                                 |
| chr11 | 48510505  | ENSG00000237388 | G > A | G > D | low density lipoprotein receptor-related protein 4                                       |
| chr11 | 55032399  | ENSG00000150244 | A > C | Q > P | olfactory receptor, family 4, subfamily A, member 47                                     |
| chr11 | 55927414  | ENSG00000181752 | C > T | C > Y | tripartite motif-containing 48                                                           |
| chr11 | 58206703  | ENSG00000172362 | C > T | A > T | olfactory receptor, family 8, subfamily K, member 5                                      |
| chr11 | 58978486  | ENSG00000197629 | G > C | A > G | olfactory receptor, family 5, subfamily B, member 12                                     |
| chr11 | 62444384  | ENSG00000162191 | C > G | E > Q | macrophage expressed 1                                                                   |
| chr11 | 65631142  | ENSG00000172732 | A > G | H > R | UBX domain protein 1                                                                     |
| chr11 | 66102593  | ENSG00000174791 | T > C | N > S | MUS81 endonuclease homolog ( <i>S. cerevisiae</i> )                                      |
| chr11 | 66192465  | ENSG00000174576 | A > G | N > D | Ras and Rab interactor 1                                                                 |
| chr11 | 66243148  | ENSG00000174516 | C > T | A > V | neuronal PAS domain protein 4                                                            |
| chr11 | 68483391  | ENSG00000132749 | C > A | A > S | pellino homolog 3 ( <i>Drosophila</i> )                                                  |
| chr11 | 71726122  | ENSG00000137497 | T > A | E > D | metallothionein-like 5, testis-specific (tesmin)                                         |
| chr11 | 73677267  | ENSG00000187726 | C > T | R > C | nuclear mitotic apparatus protein 1                                                      |
| chr11 | 73850854  | ENSG00000168014 | G > A | P > L | DnaJ (Hsp40) related, subfamily B, member 13                                             |
| chr11 | 85396880  | ENSG00000179071 | A > C | N > K | C2 calcium-dependent domain containing 3                                                 |
| chr11 | 86111834  | ENSG00000149201 | C > A | T > N | coiled-coil domain containing 89                                                         |
| chr11 | 118133306 | ENSG00000149573 | C > G | V > L | coiled-coil domain containing 81 [Source:HGNC Symbol;Acc:26281]                          |
|       |           |                 |       |       | myelin protein zero-like 2                                                               |

|              |                 |                        |                 |                 |                                                                                          |
|--------------|-----------------|------------------------|-----------------|-----------------|------------------------------------------------------------------------------------------|
| chr12        | 6128388         | ENSG00000110799        | C > T           | R > H           | von Willebrand factor                                                                    |
| chr12        | 6627110         | ENSG00000010292        | C > T           | A > V           | non-SMC condensin I complex, subunit D2                                                  |
| chr12        | 9875323         | ENSG00000184293        | T > C           | T > A           | C-type lectin-like 1                                                                     |
| chr12        | 51693021        | ENSG00000110934        | C > T           | E > K           | bridging integrator 2                                                                    |
| chr12        | 53452590        | ENSG00000111077        | C > G           | H > D           | tensin like C1 domain containing phosphatase (tensin 2)                                  |
| chr12        | 55726161        | ENSG00000205329        | C > T           | P > L           | olfactory receptor, family 6, subfamily C, member 3                                      |
| chr12        | 56397802        | ENSG00000139531        | C > T           | P > L           | sulfite oxidase                                                                          |
| chr12        | 57398178        | ENSG00000166860        | G > A           | P > L           | zinc finger and BTB domain containing 39                                                 |
| chr12        | 57441459        | ENSG00000166866        | G > A           | R > *           | myosin IA                                                                                |
| chr13        | 33703738        | ENSG00000133121        | C > T           | R > H           | StAR-related lipid transfer (START) domain containing 13                                 |
| chr13        | 43918878        | ENSG00000120658        | T > C           | K > E           | ecto-NOX disulfide-thiol exchanger 1                                                     |
| chr13        | 57716532        | ENSG00000204919        | G > C           | E > Q           | proline rich 20A                                                                         |
| chr13        | 114107571       | ENSG00000153531        | A > G           | M > T           | ADP-ribosylhydrolase like 1                                                              |
| chr14        | 76958012        | ENSG00000119715        | A > C           | E > A           | estrogen-related receptor beta                                                           |
| chr14        | 77845149        | ENSG00000100583        | G > A           | G > E           | SAM domain-containing protein C14orf174                                                  |
| chr14        | 102717282       | ENSG00000080823        | A > G           | Y > H           | renal tumor antigen                                                                      |
| chr14        | 105609459       | ENSG00000184916        | G > C           | A > G           | jagged 2                                                                                 |
| chr15        | 50534647        | ENSG00000140287        | G > A           | T > I           | histidine decarboxylase                                                                  |
| chr15        | 55664110        | ENSG00000214882        | G > C           | A > G           | cell cycle progression 1                                                                 |
| chr16        | 23721844        | ENSG00000134398        | C > T           | V > I           | endoplasmic reticulum to nucleus signaling 2                                             |
| chr16        | 30990985        | ENSG00000099381        | T > C           | L > P           | SET domain containing 1A                                                                 |
| chr16        | 48226490        | ENSG00000121270        | T > A           | I > F           | ATP-binding cassette, sub-family C (CFTR/MRP), member 11                                 |
| chr16        | 57601982        | ENSG00000159618        | G > C           | V > L           | G protein-coupled receptor 114                                                           |
| chr16        | 70289732        | ENSG00000090861        | G > A           | R > W           | alanyl-tRNA synthetase                                                                   |
| chr16        | 71065672        | ENSG00000157423        | T > C           | Y > C           | hydrocephalus inducing homolog (mouse)                                                   |
| chr16        | 71094532        | ENSG00000157423        | C > T           | G > S           | hydrocephalus inducing homolog (mouse)                                                   |
| chr16        | 81209298        | ENSG00000166473        | C > G           | G > A           | polycystic kidney disease 1-like 2                                                       |
| chr17        | 5037281         | ENSG00000129204        | T > C           | Y > H           | ubiquitin specific peptidase 6 (Tre-2 oncogene)                                          |
| chr17        | 8015486         | ENSG00000179148        | A > T           | L > M           | arachidonate lipoxygenase 3                                                              |
| chr17        | 15638936        | ENSG00000214946        | A > G           | D > G           | TBC1 domain family, member 26                                                            |
| chr17        | 15644436        | ENSG00000214946        | G > C           | E > Q           | TBC1 domain family, member 26                                                            |
| chr17        | 18544392        | ENSG00000189375        | T > C           | D > G           | TBC1 domain family, member 28                                                            |
| chr17        | 56690784        | ENSG00000121101        | G > A           | R > *           | testis expressed 14                                                                      |
| chr17        | 58285542        | ENSG00000170832        | G > A           | R > W           | ubiquitin specific peptidase 32                                                          |
| chr19        | 37383068        | ENSG00000185869        | T > C           | K > E           | zinc finger protein 829                                                                  |
| <b>chr19</b> | <b>42753717</b> | <b>ENSG00000105722</b> | <b>G &gt; A</b> | <b>R &gt; *</b> | <b>Ets2 repressor factor</b>                                                             |
| chr19        | 45912492        | ENSG00000117877        | G > C           | K > N           | CD3e molecule, epsilon associated protein                                                |
| chr19        | 49167531        | ENSG00000142233        | A > G           | I > T           | netrin 5                                                                                 |
| chr19        | 52448007        | ENSG00000176024        | A > C           | S > R           | zinc finger protein 613                                                                  |
| chr19        | 53208330        | ENSG00000213020        | C > T           | V > M           | zinc finger protein 611                                                                  |
| chr19        | 54407979        | ENSG00000126583        | G > A           | V > M           | protein kinase C, gamma                                                                  |
| chr19        | 54754973        | ENSG00000105609        | T > A           | R > S           | leukocyte immunoglobulin-like receptor, subfamily B (with TM and ITIM domains), member 5 |
| chr19        | 55263689        | ENSG00000243772        | A > G           | E > G           | killer cell immunoglobulin-like receptor, two domains, short cytoplasmic tail, 2         |
| chr19        | 55915741        | ENSG00000108106        | G > A           | P > L           | ubiquitin-conjugating enzyme E2S                                                         |

|       |           |                 |       |       |                                                                            |
|-------|-----------|-----------------|-------|-------|----------------------------------------------------------------------------|
| chr19 | 57838058  | ENSG00000178229 | G > A | W > * | zinc finger protein 543                                                    |
| chr20 | 259928    | ENSG00000196476 | C > G | S > T | Uncharacterized protein C20orf96                                           |
| chr20 | 2517926   | ENSG00000149488 | G > T | V > L | transmembrane channel-like 2                                               |
| chr20 | 6060176   | ENSG00000101311 | C > A | R > S | fermitin family homolog 1 (Drosophila)                                     |
|       |           |                 |       |       | solute carrier family 24<br>(sodium/potassium/calcium exchanger), member 3 |
| chr20 | 19674019  | ENSG00000185052 | G > T | A > S |                                                                            |
| chr20 | 23965995  | ENSG00000149435 | A > T | V > E | gamma-glutamyltransferase light chain 1                                    |
|       |           |                 |       |       | bactericidal/permeability-increasing protein-like 1                        |
| chr20 | 31598859  | ENSG00000078898 | C > T | R > W |                                                                            |
| chr20 | 62187957  | ENSG00000125531 | T > C | L > P | Uncharacterized protein C20orf195                                          |
| chr21 | 44485379  | ENSG00000160200 | G > A | R > C | cystathionine-beta-synthase                                                |
|       |           |                 |       |       | PWP2 periodic tryptophan protein homolog (yeast)                           |
| chr21 | 45537819  | ENSG00000241945 | G > A | E > K |                                                                            |
| chr22 | 38039746  | ENSG00000100092 | C > T | T > M | SH3-domain binding protein 1                                               |
|       |           |                 |       |       | protein kinase C and casein kinase substrate in neurons 2                  |
| chr22 | 43275082  | ENSG00000100266 | C > T | D > N |                                                                            |
| chrX  | 1734138   | ENSG00000196433 | G > T | A > S | acetylserotonin O-methyltransferase                                        |
| chrX  | 48121222  | ENSG00000126752 | T > G | F > C | synovial sarcoma, X breakpoint 1                                           |
| chrX  | 50350757  | ENSG00000158352 | T > G | K > Q | shroom family member 4                                                     |
| chrX  | 155004014 | ENSG00000168939 | G > A | A > T | sprouty homolog 3 (Drosophila)                                             |

**Supplementary Table 2.** Clinical features of subjects heterozygous for *ERF* mutations

| Family | ID    | Sex | Mutation (protein) | Age at assessment (years) | Syndromic (S) or non-syndromic (N);<br>C= Crouzon syndrome suggested | Craniosynostosis diagnosed (+ or -) | Diagnostic method (CT scan or SXR) | Sutures fused (specify S, Me, RC, LC,<br>RL, LL or P, pansynostosis) | Chiari type I malformation   | Raised ICP measured (Pre- or Post -<br>first procedure) CB=copper-beaten<br>appearance of skull | Age (years) at 1 <sup>st</sup> craniofacial surgery | Number of major craniofacial surgical<br>procedures | Craniofacial signs (hypertelorism (H),<br>midface hypoplasia (M), exorbitism<br>(E), macrocephaly >97 <sup>th</sup> centile (MC)) | Neurodevelopmental features                                                                                         | Developmental Quotient (Verbal/non-<br>verbal) | Other features                                            |
|--------|-------|-----|--------------------|---------------------------|----------------------------------------------------------------------|-------------------------------------|------------------------------------|----------------------------------------------------------------------|------------------------------|-------------------------------------------------------------------------------------------------|-----------------------------------------------------|-----------------------------------------------------|-----------------------------------------------------------------------------------------------------------------------------------|---------------------------------------------------------------------------------------------------------------------|------------------------------------------------|-----------------------------------------------------------|
| 1      | II-2  | F   | R183*              | 62                        |                                                                      | na                                  |                                    |                                                                      |                              |                                                                                                 | na                                                  | 0                                                   | MC                                                                                                                                |                                                                                                                     |                                                |                                                           |
| 1      | III-3 | F   | R183*              | 38                        | S (C)                                                                | na                                  |                                    |                                                                      |                              |                                                                                                 | na                                                  | 0                                                   | E, M                                                                                                                              |                                                                                                                     |                                                |                                                           |
| 1      | IV-1  | M   | R183*              | 15                        | S                                                                    | +                                   | CT                                 | P                                                                    | Low<br>cerebellar<br>tonsils | Pre                                                                                             | 10                                                  | 1                                                   | H, E                                                                                                                              | Average verbal ability;<br>low average perceptual<br>organization, processing speed,<br>attention and concentration |                                                |                                                           |
| 1      | IV-2  | M   | R183*              | 11                        | S                                                                    | +                                   | CT                                 | Me,S,<br>LC                                                          | -                            | Post                                                                                            | 0.9                                                 | 3                                                   | H                                                                                                                                 | Pervasive developmental delay,<br>severe speech and language<br>delay, behavioural difficulties                     | 80/77<br>aged 7.1<br>yr                        | Grommet R ear (middle<br>ear effusion)                    |
| 2      | II-1  | M   | F504Lfs*27         | 4.0                       | S                                                                    | +                                   | na                                 | na                                                                   | -                            |                                                                                                 |                                                     | na                                                  | H                                                                                                                                 | Mild intellectual disability                                                                                        |                                                | Short digits                                              |
| 3      | II-1  | M   | G299Rfs*9          | 10                        | S                                                                    | +                                   | SXR                                | P                                                                    | -                            | CB                                                                                              | na                                                  | 0                                                   | H, E,<br>downslanting<br>palpebral<br>fissures                                                                                    | Global developmental delay,<br>poor attention span and<br>receptive language; behavioural<br>difficulties           |                                                | -                                                         |
| 4      | II-2  | F   | R86C               | 43                        |                                                                      | na                                  |                                    |                                                                      |                              |                                                                                                 | na                                                  | 0                                                   |                                                                                                                                   |                                                                                                                     |                                                | childhood epilepsy<br>5 <sup>th</sup> finger clinodactyly |
| 4      | III-1 | M   | R86C               | 9.6                       | N                                                                    | +                                   | CT                                 | RL                                                                   | +(surgery<br>7.4 yr)         |                                                                                                 | 1.9                                                 | 1                                                   | MC                                                                                                                                | Speech and language delay                                                                                           | <50/88<br>aged 1.9<br>yr                       | middle ear effusions,<br>tonsillectomy                    |
| 5      | II-1  | M   | R65Q               | 39                        | N                                                                    | na                                  |                                    |                                                                      |                              |                                                                                                 | na                                                  | 0                                                   | MC                                                                                                                                |                                                                                                                     |                                                |                                                           |
| 5      | III-1 | M   | R65Q               | 9.9                       | N                                                                    | +                                   | CT                                 | S (RC)                                                               | -                            |                                                                                                 | 2.0                                                 | 1                                                   |                                                                                                                                   |                                                                                                                     | 87/85<br>aged 1.6<br>yr                        | platelet disorder                                         |
| 6      | II-1  | M   | M1I                | 69                        |                                                                      | na                                  |                                    |                                                                      |                              |                                                                                                 | na                                                  | 0                                                   | H                                                                                                                                 |                                                                                                                     |                                                | Obstructive sleep apnoea                                  |
| 6      | III-1 | F   | M1I                | 39                        |                                                                      | na                                  |                                    |                                                                      |                              |                                                                                                 | na                                                  | 0                                                   | MC                                                                                                                                |                                                                                                                     |                                                | bipolar disorder                                          |
| 6      | III-2 | M   | M1I                | 41                        | S                                                                    | na                                  |                                    |                                                                      |                              |                                                                                                 | na                                                  | 0                                                   | H, M, E, MC                                                                                                                       |                                                                                                                     |                                                | orthodontic brace upper<br>teeth, broad halluces          |

|    |       |   |             |     |       |    |     |                      |                       |     |      |   |         |                                                                                                                                                                         |                           |                                                                                                                               |
|----|-------|---|-------------|-----|-------|----|-----|----------------------|-----------------------|-----|------|---|---------|-------------------------------------------------------------------------------------------------------------------------------------------------------------------------|---------------------------|-------------------------------------------------------------------------------------------------------------------------------|
| 6  | IV-2  | M | MII         | 11  | S (C) | +  | CT  | S, RC,<br>LC, LL     | -                     | Pre | 5.4  | 1 | H, M, E | Relative delay in expressive<br>language and processing speed                                                                                                           | 116/142<br>aged 5.3<br>yr | adenotonsillectomy                                                                                                            |
| 7  | II-2  | F | G299Rfs*9   | 38  | S     | na |     |                      |                       |     | na   | 0 | E       |                                                                                                                                                                         |                           | short digits                                                                                                                  |
| 7  | III-1 | F | G299Rfs*9   | 18  | S (C) | +  | SXR | RC,<br>LC,<br>RL, LL |                       | CB  | na   | 0 | H, M, E |                                                                                                                                                                         |                           |                                                                                                                               |
| 7  | III-2 | F | G299Rfs*9   | 7.3 | S     | +  | SXR | RL, LL               |                       |     | na   | 0 | H       | Hyperactivity, poor<br>concentration                                                                                                                                    |                           |                                                                                                                               |
| 8  | II-1  | M | G299Rfs*9   | 9.4 | N     | +  | CT  | S, RL,<br>LL         | -                     | Pre | 4.3  | 1 |         | Specific language impairment                                                                                                                                            | 75/112<br>aged 4.3<br>yr  | adenotonsillectomy,<br>grommets                                                                                               |
| 9  | II-2  | F | Q424*       | 46  | S     | na |     |                      |                       |     | na   | 0 | H       |                                                                                                                                                                         |                           | Atrial or ventricular septal<br>defect, von Willebrand<br>disease                                                             |
| 9  | III-1 | F | Q424*       | 10  | S (C) | +  | SXR | P                    | +(surgery<br>9 yr)    | CB  | na   | 0 | H, E    | Mild early speech delay, poor<br>coordination/<br>concentration; now<br>academically ok                                                                                 |                           | Thoracic and lumbar<br>scoliosis, broad toes                                                                                  |
| 9  | III-2 | M | Q424*       | 8   | S     | -  |     |                      | +                     |     | na   | 0 | H, E    | Poor concentration                                                                                                                                                      |                           | Broad toes                                                                                                                    |
| 10 | II-1  | M | R86C        | 5.6 | S (C) | +  | CT  | S, RL,<br>LL         | +(surgery<br>0.75 yr) | Pre | 0.33 | 2 | H, E    | Speech articulation disorder<br>with verbal dyspraxia; general<br>motor developmental dyspraxia;<br>Normal receptive and<br>expressive language, cognitive<br>abilities |                           | Class 1 dental<br>malocclusion<br>Adenoidectomy Mild<br>subglottic stenosis<br>R inguinal hernia<br>Broad thumbs and halluces |
| 11 | II-2  | F | G8_F9ins147 | 23  | S     | na |     |                      |                       |     | na   | 0 | MC      |                                                                                                                                                                         |                           |                                                                                                                               |
| 11 | II-3  | M | G8_F9ins147 | 22  |       | na |     |                      |                       |     | na   | 0 | MC      |                                                                                                                                                                         |                           |                                                                                                                               |
| 11 | III-1 | M | G8_F9ins147 | 1.7 | S (C) | +  | CT  | S                    | -                     |     | 1.4  | 1 | H       |                                                                                                                                                                         | 103/100<br>aged 1.4<br>yr |                                                                                                                               |
| 12 | II-1  | M | K401Efs*10  | 4   | S     | +  | CT  | P                    | -                     | Pre | 2.4  | 1 | H       | Delayed development, poor<br>attention span, problems with<br>writing                                                                                                   |                           | Brachydactyly of hands<br>and feet, broad halluces,<br>dysplastic ears                                                        |

Abbreviations not defined at top: F, female, M, male; CT, computed tomography, SXR, skull X-ray; +, present, -, absent, na, not applicable; Me, metopic, S, sagittal, RC right coronal, LC, left coronal, RL, right lambdoid, LL, left lambdoid.



**Supplementary Table 3.** Combinations of sutures fused in subjects assessed by CT scanning with 3-dimensional reconstruction

| Family  | Individual | Metopic | Sagittal | Right coronal | Left coronal | Right lambdoid | Left lambdoid |
|---------|------------|---------|----------|---------------|--------------|----------------|---------------|
| 1       | IV-1       |         | +        | +             | +            | +              | +             |
| 1       | IV-2       | +       | +        |               | +            |                |               |
| 4       | III-1      |         |          |               |              | +              |               |
| 5       | III-1      |         | +        | (+)           |              |                |               |
| 6       | IV-2       |         | +        | +             | +            |                | +             |
| 8       | II-1       |         | +        |               |              | +              | +             |
| 10      | II-1       |         | +        |               |              | +              | +             |
| 11      | II-1       |         | +        |               |              |                |               |
| Total/8 |            | 1       | 7        | 2(3)          | 3            | 4              | 4             |

(+) indicates fusion occurred post-operatively

**Supplementary Table 9. Summary statistics for exome sequencing**

|                                                                               |                                      |                                                                                                                                                                                                   | <b>reads</b>                          |
|-------------------------------------------------------------------------------|--------------------------------------|---------------------------------------------------------------------------------------------------------------------------------------------------------------------------------------------------|---------------------------------------|
| 1                                                                             | Input                                | Raw data obtained from 51 bp paired-end sequencing                                                                                                                                                | 30,471,986 (x2)                       |
| 2                                                                             | MAP_SAM_OUTPUT:<br>bowtie -a         | Map to whole genome – all hits recorded                                                                                                                                                           | 107,738,084                           |
| 3                                                                             | GET_HITS:<br>get_mapped.pl           | Remove unmapped sequences                                                                                                                                                                         | 85,397,636                            |
| 4                                                                             | GET_UNIQUE_PAIRS:<br>parse_sam5.pl   | Remove PCR artefacts (only paired-reads with highest total Phred score are retained)                                                                                                              | 81,546,798                            |
| 5                                                                             | FIND_BEST_HITS:<br>find_best_hits.pl | Remove pseudogenes (if a read pair maps to more than 1 location only those which have the lowest number of mismatches over both ends and which map on or near an exome capture bait are retained) | 32,061,328 (52.6% map on/near target) |
| <b>Variant analysis</b>                                                       |                                      |                                                                                                                                                                                                   | <b>variants</b>                       |
| Average read depth                                                            |                                      |                                                                                                                                                                                                   | 43                                    |
| Total number of variants                                                      |                                      |                                                                                                                                                                                                   | 45,372                                |
| Number of exonic variants                                                     |                                      |                                                                                                                                                                                                   | 20,332                                |
| dbSNP131/1000 genomes filtering                                               |                                      |                                                                                                                                                                                                   | 1,120                                 |
| SNP array segregation analysis                                                |                                      |                                                                                                                                                                                                   | 653                                   |
| Artefact exclusion (due to highly homologous sequences)                       |                                      |                                                                                                                                                                                                   | 422                                   |
| Number of synonymous changes remaining                                        |                                      |                                                                                                                                                                                                   | 185                                   |
| Number of non-synonymous changes remaining                                    |                                      |                                                                                                                                                                                                   | 237                                   |
| Excluding non-synonymous changes found in other 2 patients (likely artefacts) |                                      |                                                                                                                                                                                                   | 135                                   |

**Supplementary Table 10. Primers and amplification conditions**

| <b>Screening</b>                                                                      |                                                                |                                                                      |                   |                                       |                  |
|---------------------------------------------------------------------------------------|----------------------------------------------------------------|----------------------------------------------------------------------|-------------------|---------------------------------------|------------------|
| Amplicon                                                                              | Primer sequence 5'→3' (M13 tags in lowercase)                  |                                                                      | Product size (bp) | Amplification conditions <sup>a</sup> |                  |
|                                                                                       | Forward                                                        | Reverse                                                              |                   |                                       |                  |
| Ex1 F/R                                                                               | gtaaacgacggccagtGGAGGGGGCGGGCGCAGTGTCTCCATGG                   | agcggataacaattcacacaggaGGTCCCCCAGAAGTGGGGATCACTC                     | 386               | 66°C + DMSO                           |                  |
| Ex2 F/R                                                                               | gtaaacgacggccagtCCCATGTTGAAGGCAGGGCAGAGGTGG                    | agcggataacaattcacacaggaCCCAAGGTCACACAGCTAGGATTTGG                    | 463               | 66°C                                  |                  |
| Ex3 F/R                                                                               | gtaaacgacggccagtGTGTTAAGGTGTGGAGTCTAGACCTGGG                   | agcggataacaattcacacaggaGAAGAGGGAAGATGAAGATGAAGAGC                    | 421               | 66°C                                  |                  |
| Ex4 F1/R1                                                                             | gtaaacgacggccagtGTGCCGTCGGGTGGTAGCCACTTCCG                     | agcggataacaattcacacaggaGTCCTCAGGGCTGAAGGAGAAGTGGG                    | 525               | 66°C                                  |                  |
| Ex4 F2/R2                                                                             | gtaaacgacggccagtGCTGAGCCCCGATGTACCCAGTGGTGG                    | agcggataacaattcacacaggaCTGATGTCAGTCACCTCTACCTCCTC                    | 487               | 66°C                                  |                  |
| Ex4 F3/R3                                                                             | gtaaacgacggccagtGATCAAGGTGGAGCCCATCTCGGAAGG                    | agcggataacaattcacacaggaGTGGGGAGGGAAAAGGGAGGAGGCAGGG                  | 506               | 66°C                                  |                  |
| <b>Mutation confirmation</b>                                                          |                                                                |                                                                      |                   |                                       |                  |
| Mutation                                                                              | Primer sequence 5'→3'                                          |                                                                      | Product size (bp) | Amplification conditions <sup>a</sup> | Digest           |
|                                                                                       | Forward                                                        | Reverse                                                              |                   |                                       |                  |
| 547C>T                                                                                | GTACCAGGGATGGTTGGTGTGGAGAGGG                                   | GACTCGGAAGACACCAGGGTCATGGGG                                          | 414               | 66°C                                  | HaeIII(-)        |
| 1512delT                                                                              | GATCAAGGTGGAGCCCATCTCGGAAGG                                    | GTGGGGAGGGAAAAGGGAGGAGGCAGGG                                         | 506               | 66°C                                  | SEQ <sup>b</sup> |
| 891 892delAG                                                                          | GCTGAGCCCAGTGTACCCAGTGGTGG                                     | CTGATGTCAGTCACCTCTACCTCCTC                                           | 487               | 66°C                                  | AvaI(+)          |
| 256C>T                                                                                | CCCATGTTGAAGGCAGGGCAGAGGTGG                                    | CCCAAGGTCACACAGCTAGGATTTGG                                           | 463               | 66°C                                  | Acil(-)          |
| 194G>A                                                                                | CCCATGTTGAAGGCAGGGCAGAGGTGG                                    | CCCAAGGTCACACAGCTAGGATTTGG                                           | 463               | 66°C                                  | HpaII(-)         |
| 3G>A                                                                                  | GCGGCCCGGAATCGGGGCGCTTCG                                       | GGTCCCCCAGAAGTGGGGATCACTC                                            | 181               | + DMSO                                | NlaIII(-)        |
| 1270C>T                                                                               | TTCTGCACTACCCTGGGCTGGTGGTGCC                                   | ACTCGCCTTCCGAGATGGGCTCCACCAGGATCT <sup>c</sup>                       | 313               | 66°C                                  | AlwNI(-)         |
| 21A>T                                                                                 | GGAGGGGGCGGGCGCAGTGTCTCCATGG                                   | GGTCCCCCAGAAGTGGGGATCACTC                                            | 386               | 66°C                                  | TspRI(+)         |
| <b>Primers and amplification conditions for cDNA analysis of 21A&gt;T (Family 11)</b> |                                                                |                                                                      |                   |                                       |                  |
| cDNA                                                                                  | Primer sequence 5'→3'                                          |                                                                      | Product size (bp) | Amplification conditions <sup>a</sup> | Primers          |
| Fragment                                                                              | Forward                                                        | Reverse                                                              |                   |                                       |                  |
| WT                                                                                    | GCGGCCCGGAATCGGGGCGCTTCG                                       | CACTCTGGGGCACTGCACCCCAAGCAACC                                        | 432               | + DMSO                                | 1F1, ex3/4R      |
| Mutant                                                                                | GCGGCCCGGAATCGGGGCGCTTCG                                       | CGTGAAGGTCACCAGCAGGACCGCGCA                                          | 482               | + DMSO                                | 1F1, 11R         |
| Mutant                                                                                | CCCTCAAGCACTGGAGACCTGTTGCTTCTC                                 | CACTCTGGGGCACTGCACCCCAAGCAACC                                        | 694               | + DMSO                                | 11F, ex3/4       |
| <b>Primers used for parental origin analysis in Family 8</b>                          |                                                                |                                                                      |                   |                                       |                  |
| Allele                                                                                | Primer sequence 5'→3'                                          |                                                                      | Product size (bp) | Amplification conditions <sup>a</sup> | Digest           |
|                                                                                       | Forward                                                        | Reverse                                                              |                   |                                       |                  |
| C                                                                                     | GGAGGAACCGCTGGGAGAGGATCCCCGCG                                  | GTCCTCAGGGCTGAAGGAGAAGTGGG                                           | 340               | 63°C                                  | AvaI(+)          |
| G                                                                                     | GGAGGAACCGCTGGGAGAGGATCCCCGGG                                  | GTCCTCAGGGCTGAAGGAGAAGTGGG                                           | 340               | 63°C                                  | AvaI(+)          |
| <b>Multiplex ligation-dependent probe amplification (MLPA)<sup>d</sup></b>            |                                                                |                                                                      |                   |                                       |                  |
| Probe                                                                                 | Primer sequence 5'→3'                                          |                                                                      | Product size (bp) |                                       |                  |
|                                                                                       | Forward                                                        | Reverse                                                              |                   |                                       |                  |
| 1 (Intron 1)                                                                          | gggttcctaagggttggaCGTCCACCGGGCCGCTATCCCT                       | GGTTCGCGCTGCGCGGTCTGCTGGTGACCTTCatctagattgattcttctggcac              | 101               |                                       |                  |
| 2 (exon 2)                                                                            | gggttcctaagggttggaGGGCGTCAATTGCCTGGCAGGGGACTACGGGGAATTCGTCATCA | AAGACCTGATGAGGTGGCCCGCTGTGGGGCGTTCCGAAGTGCAAgctctagattgattcttctggcac | 133               |                                       |                  |
| 3 (exon 4-5')                                                                         | gggttcctaagggttggaGGGCCGAGGCTCAGTCAGTGACTGTA                   | GTGATGGCACGTCAGAGCTGGAGGAACCGCTGGGAGAGGActctagattgattcttctggcac      | 108               |                                       |                  |
| 4 (exon 4-3')                                                                         | gggttcctaagggttggaGACTGACATCAGTGATGAGGATGAGGAAGACGGGGAGGTGTTCA | AGACGCCCGTGGCCCACTGCACCCCTAAGCCTGAGCCctctagattgattcttctggcac         | 127               |                                       |                  |

| Double-strand oligonucleotides encompassing the core Ets/Runx binding site - 5'-AGAGGATGTGGTTT-3', 5'-AAACCACATCCTCT-3' |                              |                               |             |
|-------------------------------------------------------------------------------------------------------------------------|------------------------------|-------------------------------|-------------|
| <b>Erf targeting</b>                                                                                                    |                              |                               |             |
| StopF2/5578R                                                                                                            | ACCGAGATTCCTGAGAGCTAT        | AGAGACTAAAGAGAGCTGTCC         |             |
| Intr1-2/5578R                                                                                                           | ATCATACATGTTTCTGAGGGG        | AGAGACTAAAGAGAGCTGTCC         |             |
| <b>Primers used for quantitative mRNA analysis of E16 calvaria<sup>o</sup></b>                                          |                              |                               |             |
| Gene                                                                                                                    | Primer sequence 5'→3'        |                               | Intron span |
|                                                                                                                         | 5'                           | 3'                            |             |
| <i>Ibsp (BSP)</i>                                                                                                       | GAAACGGTTTCCAGTCCAG          | CTGAAACCCGTTTCAGAAGG          | Yes         |
| <i>Colla2</i>                                                                                                           | TGAAGTGGGTCTTCCAGGTC         | GACCAGGCTCACCAACAAGT          | Yes         |
| <i>Fos</i>                                                                                                              | ATGGGCTCTCTGTCAACAC          | ACGGAGGAGACCAGAGTGG           | Yes         |
| <i>Fosb</i>                                                                                                             | CCTTCAACCAGCACAAACCAC        | CTTCAAGCTGATCAGTTTCCG         | Yes         |
| <i>Jun</i>                                                                                                              | GAAAAGTAGCCCCAACCTC          | AATCAGACAGGGGACACAGC          | No          |
| <i>Junb</i>                                                                                                             | GCAGCTACTTTTCGGGTCAG         | AAAAGTACTGTCCGGAGGC           | No          |
| <i>Sp7</i>                                                                                                              | TCTGCTTGAGGAAGAAGCTC         | TCCATTGGTGTGAGAAGG            | Yes         |
| <i>Tgfb1</i>                                                                                                            | GGAGAGCCCTGGATACCAAC         | AAGTTGGCATGGTAGCCCTT          | Yes         |
| <i>Serinc5</i>                                                                                                          | ACGTGATGATGACTCTGACC         | CACCAGTTGCTGCTTAAACC          | Yes         |
| <i>Prkg2</i>                                                                                                            | CAACCACCCGAACCTATGAC         | CTGGGGATCCAATCTCTTCA          | Yes         |
| <i>Capg</i>                                                                                                             | CTGGACAGATGAATCTGACC         | CATTCGAGAGATGAAGCCATC         | Yes         |
| <i>Anxa1</i>                                                                                                            | CCGGGAAGACAAGCAAATAC         | CCCAGGACCACCTTTGTATG          | Yes         |
| <i>Hpgd</i>                                                                                                             | CAGCAACCTGTTTATTGTGC         | TAATCCATTGGCAATGGTTG          | Yes         |
| <i>Apcdd1</i>                                                                                                           | ACTCAGACCCTGTCTGCAAG         | CACTGAAGACATTGAGGAGG          | Yes         |
| <i>Runx2</i>                                                                                                            | GAACCAAGAAGGCACAGACA         | AACTGCCTGGGGTCTGAAAA          | Yes         |
| <i>Bglap-rs1/Bglap2</i>                                                                                                 | CTCTGTCTCTGTACCTACAG         | CAGGTCCTAAATAGTGATACCG        | Yes         |
| <i>Alpl (AP)</i>                                                                                                        | AATGCCTGAAACTCCAAAAGC        | CCTCTGGTGGCATCTCGTTATC        | Yes         |
| <i>Fgf2</i>                                                                                                             | TTCTCTCTGCGCATCCATCC         | CTGGAGTATTTCCGTGACCG          | Yes         |
| <i>Erf</i>                                                                                                              | TGTGGCACTTATCCTGGAG          | CTTGTAGGTGAACCGTTCC           | Yes         |
| <i>Gapdh</i>                                                                                                            | GACTCCACGACATACTCAGC         | CCAGTATGACTCCACTCAG           | No          |
| <b>Erf RNA in situ probe</b>                                                                                            |                              |                               |             |
| mErfF2/mErfR1                                                                                                           | GCTGGAGAGAAGGCTCTAGGAGGCACTG | GGTTAAGGCAGCAAAAGCTCAGGGAGTGG |             |

Note.—<sup>a</sup>DNA was obtained from whole blood samples by phenol-chloroform extraction and was amplified in a total volume of 20 µl containing 15 mM TrisHCl (pH 8.0), 50 mM KCl, 2.5 mM MgCl<sub>2</sub>, 100 µM each dNTP, 0.4 µM primers, and 0.5 units of Amplitaq Gold polymerase (Applied Biosystems) with or without 10% DMSO. Cycling conditions consisted of an 8 min denaturation step at 94°C, followed by 35 cycles of 94°C for 30 s, 63°C or 66°C for 30 s and 72°C for 30s, with a final extension at 72°C for 10 min. Mutation confirmation was carried out by PCR using the above conditions and indicated primers, followed by restriction digest of 8 µl of PCR product.

<sup>b</sup>Confirmation carried out by dideoxy-sequencing alone.

<sup>c</sup>The reverse oligonucleotide was mutated (bases in bold) to allow discrimination of the mutation with AlwNI.

<sup>d</sup>Multiplex-ligation-dependent probe amplification was performed using synthetic oligonucleotide probes designed to *ERF* according to protocols available from MRC-Holland: <http://www.mrc-holland.com/pages/indexpag.html>. Fragments were analyzed by capillary electrophoresis using an ABI 3130 containing POP-7 polymer. Peaks were visualized using Gene Mapper v3.7 (Applied Biosystems). Common PCR primer annealing sequences are shown in lower case, hybridizing sequences are shown in upper case and the 3' probe sequence is 5' phosphorylated.

cDNA was prepared from RNA extracted from E16.5 calvariae dissected free of skin and brain and stored in Trizol, using the Stratagene AffinityScript Multi Temperature cDNA synthesis kit according to the manufacturer's instructions. Quantitative PCR was performed on a Stratagene Mx3005P instrument with Brilliant III SYBR® Green reaction reagent. Cycling conditions consisted of a 10 min denaturation step at 95°C, followed by 40 cycles of 95°C for 30 s, 56°C for 30 s and 72°C for 30 s.

Supplementary Figure 1. Pedigrees of 12 families with mutations in *ERF* and results of dideoxy-sequencing

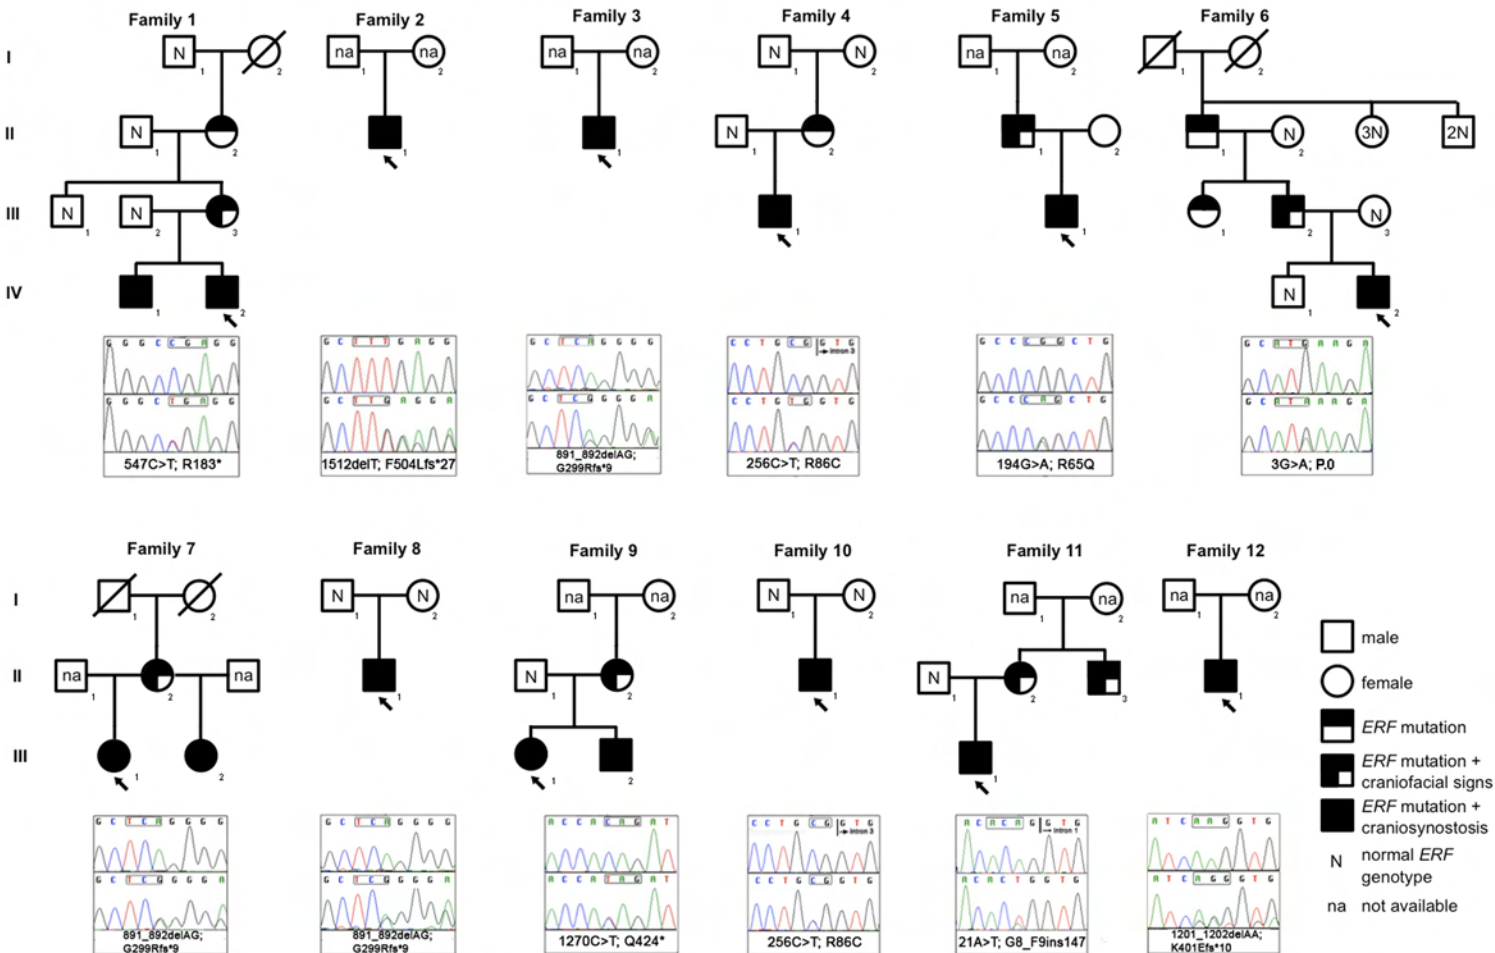

For each family, the individuals analyzed in the pedigree (see key to symbols) are shown together with a representative sequence chromatogram for a normal control (above) and affected individual (below).

Supplementary Figure 2. Analysis of *de novo* ERF mutations and independent origins of identical mutations

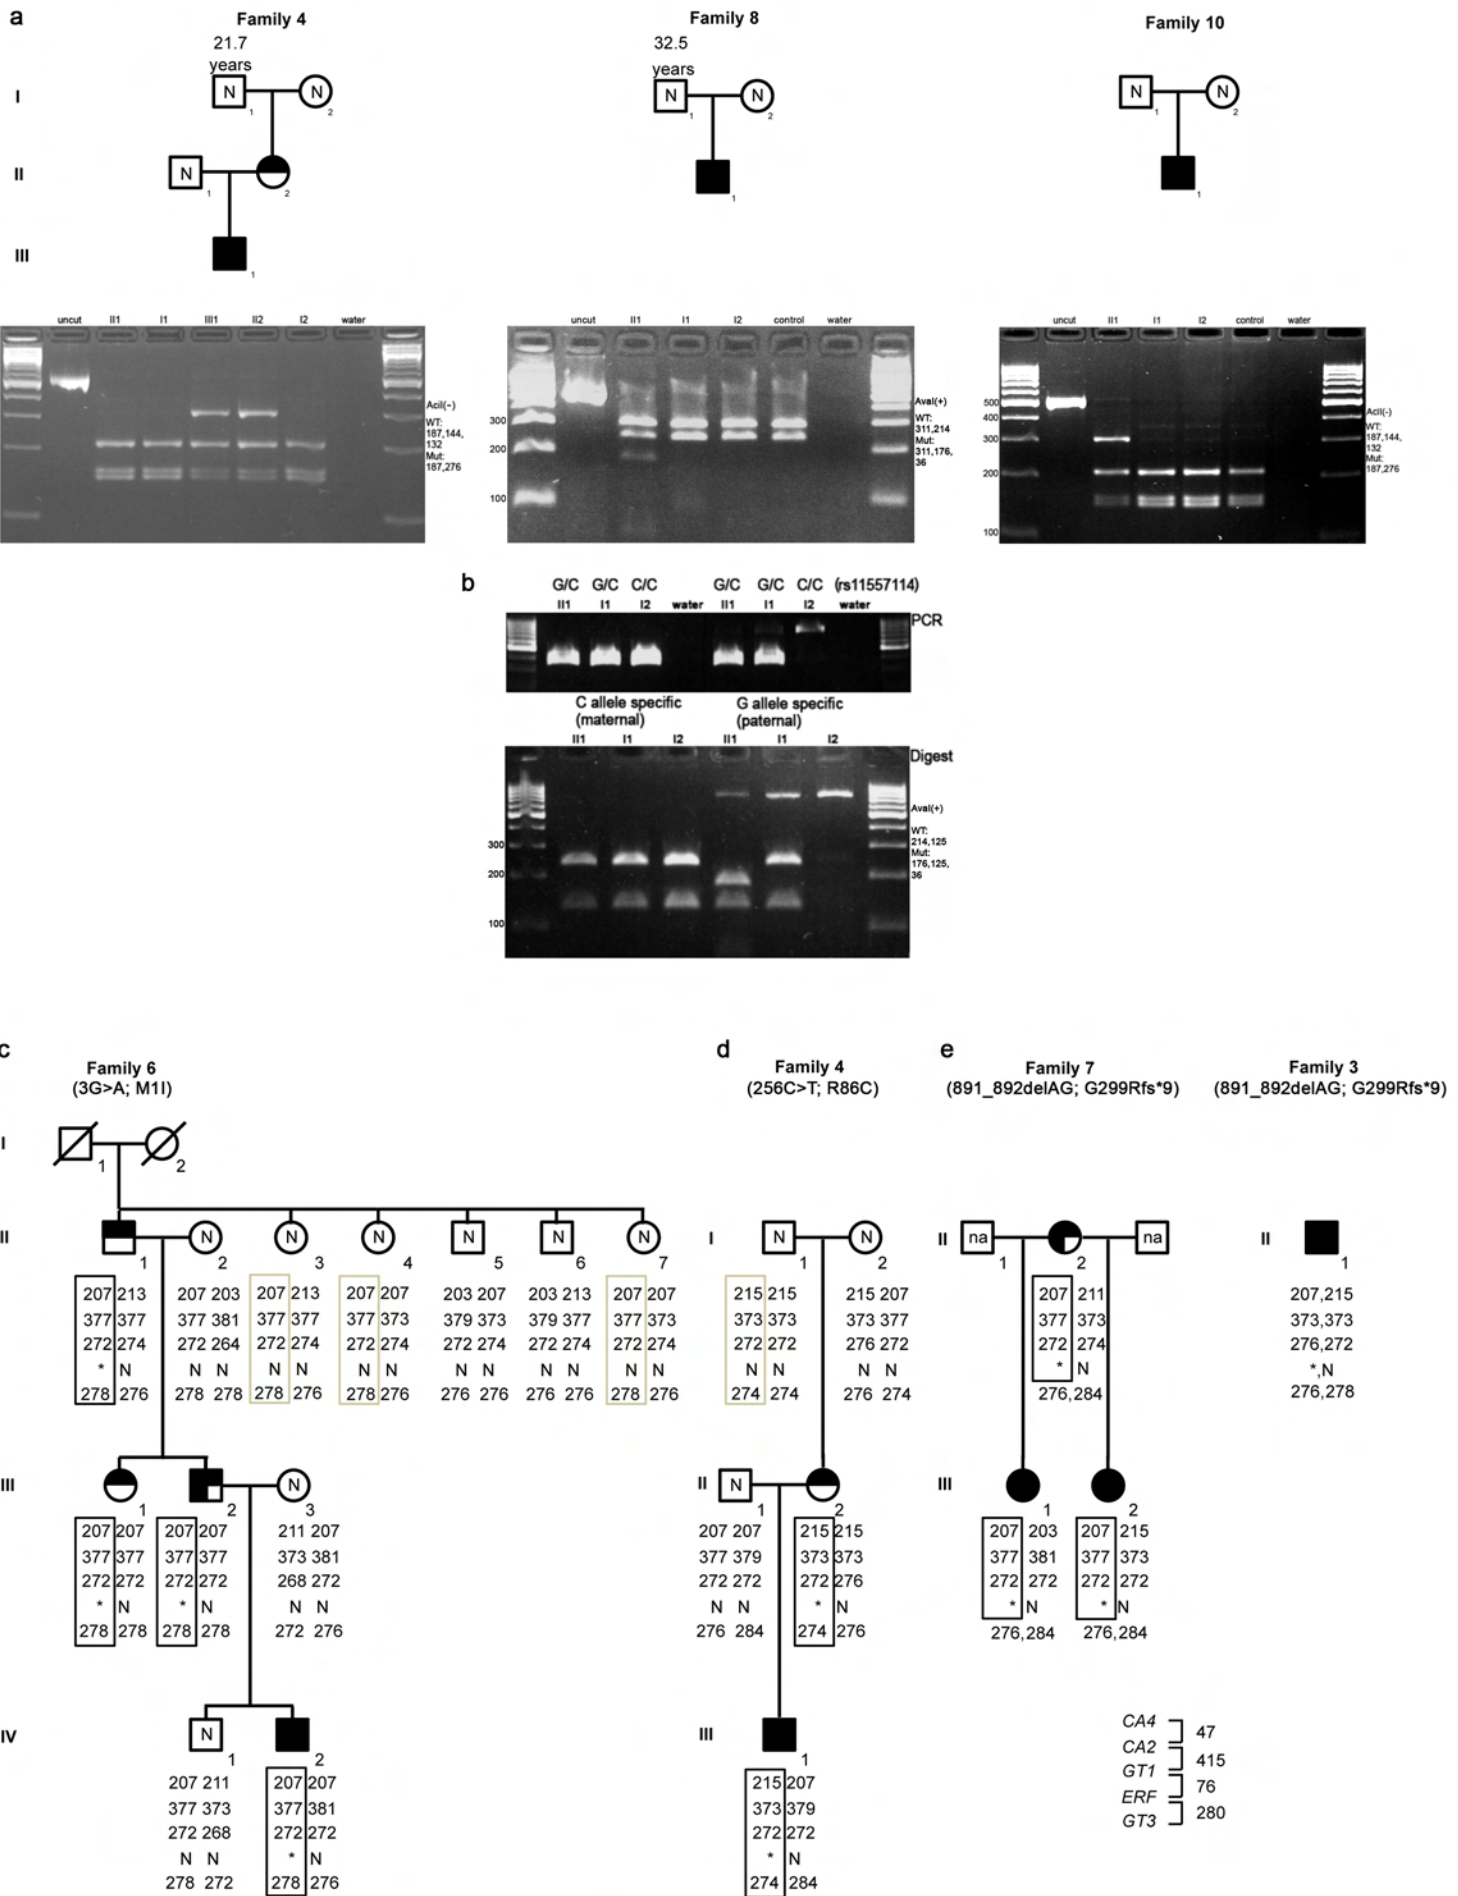

**a-b**, Restriction digest analysis to demonstrate *de novo* mutations. For families 4, 8 and 10, diagnostic digests demonstrate absence of the mutation in either the parental (Families 8, 10) or grandparental (Family 4) generation (upper panel). The lower panel, **b**, illustrates allele-specific PCR analysis of rs11557114 C/G SNP, demonstrating the paternal origin of mutation in Family 8 (in Family 4, microsatellite analysis was employed, see section **d**). Ages of unaffected fathers at birth of their affected child are indicated. **c-e**, Analysis of chromosome segregation around *ERF* using 4 microsatellite markers. **c**, In Family 6, the mutation is shown to have arisen *de novo* in individual II-1 because 3 of his mutation-negative siblings (II-3, II-4, II-7) inherited the same chromosome that bears his *ERF* mutation. **d**, In Family 4, the mutation is shown to have arisen from the unaffected grandfather. **e**, Families 7 and 3 with the same mutation have differing microsatellite genotypes at the *CA2* locus. Disease haplotypes are boxed with black surrounding lines in individuals bearing the *ERF* mutation and gray surrounding lines in *ERF* mutation-negative subjects. The position of *ERF* in relation to the microsatellites (separation in kb) is shown in the key.

Nature Genetics: doi:10.1038/ng.2539

### Supplementary Figure 3. RNA and protein studies on selected ERF mutations

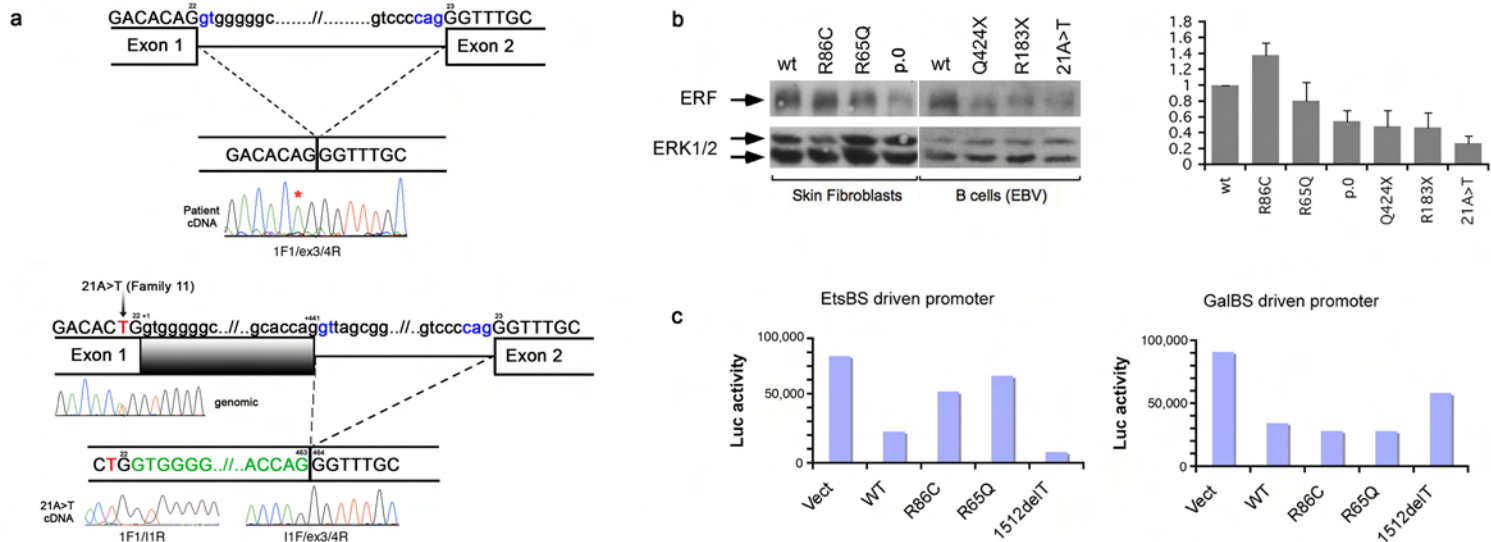

**a**, Sequence analysis of lymphoblastoid cell line cDNA from individual III-1 (Family 11, **Supplementary Figure 1**, heterozygous for 21A>T mutation). The upper panel shows the result of RT-PCR using primers located in exon 1 and exon 3/4 (1F1 and ex3/4R; see **Supplementary Table 8**): only the normal A allele (red asterisk) is visualized, indicating complete loss of the mutant T allele in the normal mRNA. In the lower panel, the intron 1 sequence contains a potential cryptic donor splice site starting at nucleotide 442. RT-PCR using primers in intron1 (reverse primer I1R combined with 1F1, and forward primer I1F combined with ex3/4R), demonstrate that the use of this cryptic splice site occurs exclusively on the allele harbouring the 21A>T mutation. **b**, Western blot analysis of selected ERF mutations in fibroblasts or lymphoblastoid cell lines. Reduced amounts of ERF are produced in cells expressing disruptive mutations (p.0, Q242X, R183X, 21A>T). The quantification in the right hand panel shows the mean  $\pm$ SD compared to wild type. ERK1/2 antibody reaction was used to control for variation in sample loading. **c**, DNA-binding domain mutants (R65Q, R86C) fail to repress Ets-binding site (EtsBS)-containing promoters (left) but function when tethered to the gal4-DNA binding domain on gal4 binding site (GalBS)-containing reporters (right). Conversely, the deletion/frame-shift mutation (1512delT) failed on gal4 but worked on the EtsBS promoter; this is expected as the ets-DNA binding domain, when overexpressed, is sufficient to out compete endogenous factors.



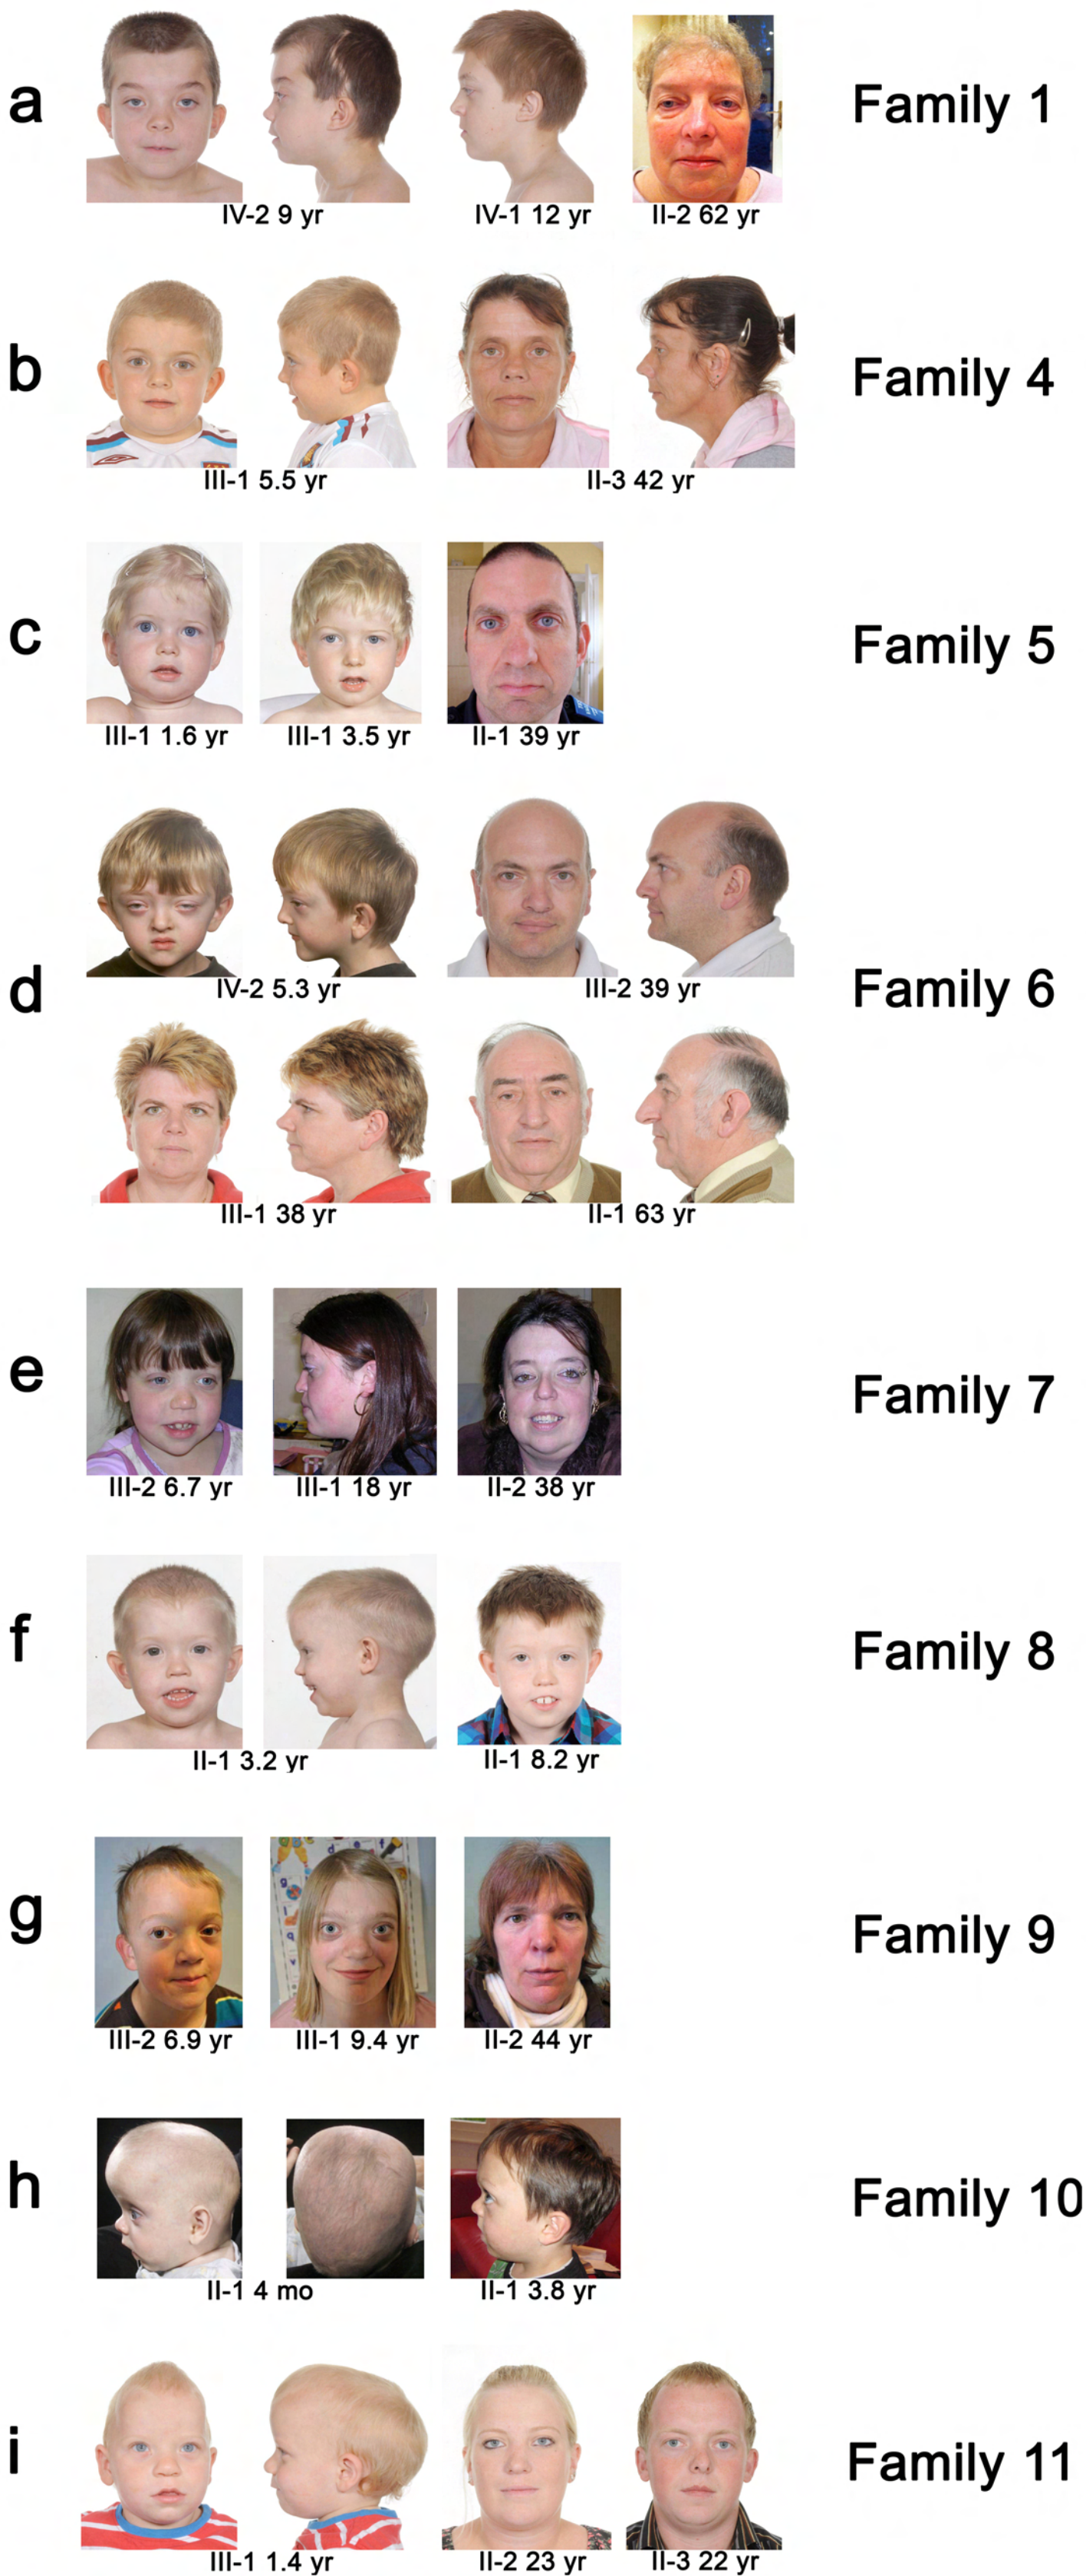

**a-i, *ERF* mutation-positive individuals from 9 families. Written consent was provided for the publication of all photographs.**

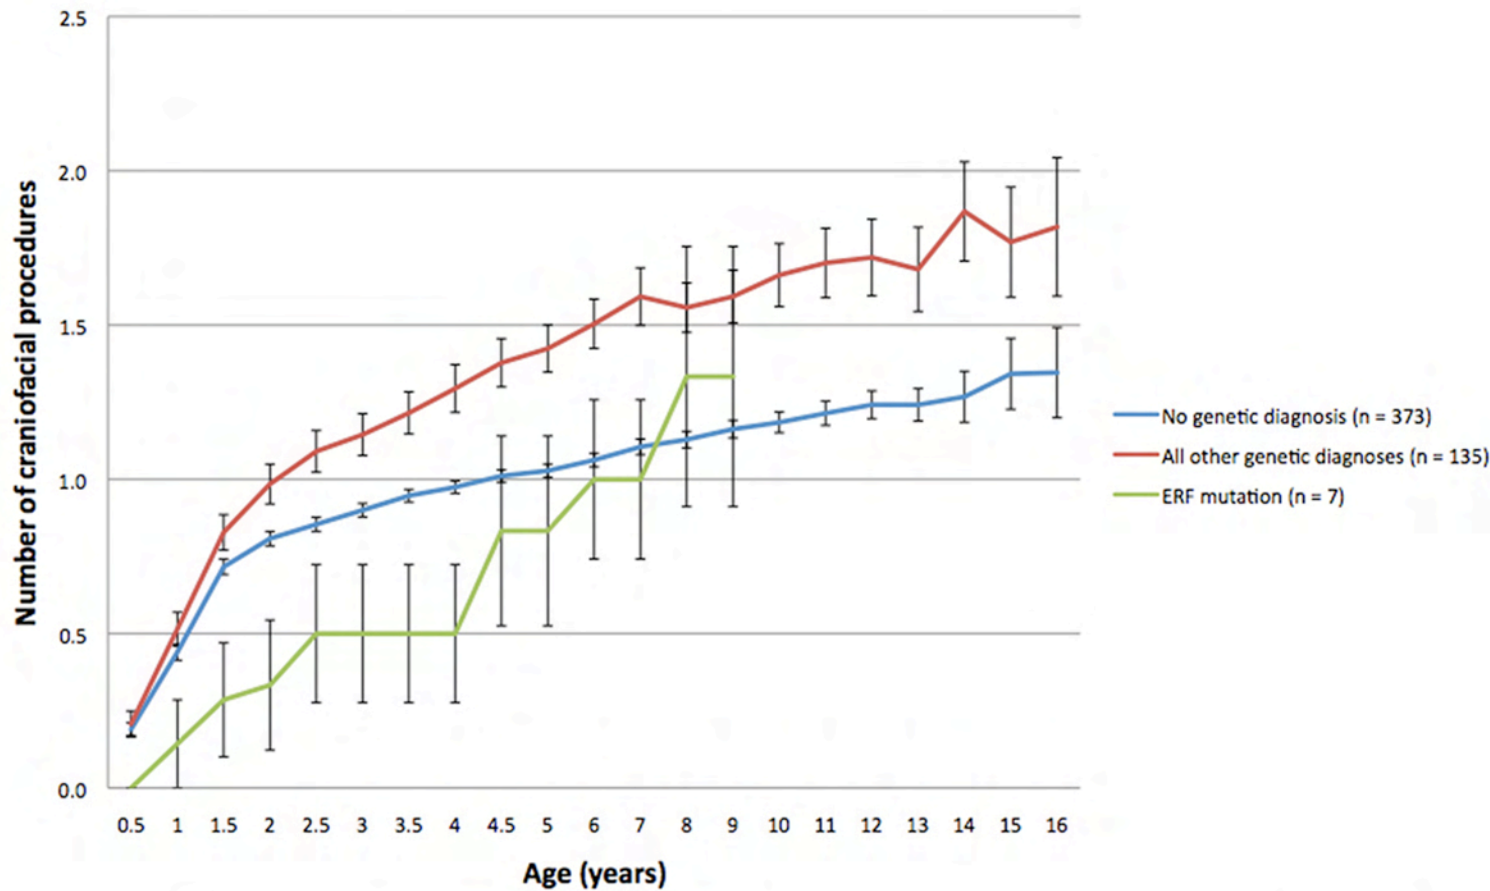

Points show the average number of major craniofacial procedures undertaken at a given age  $\pm$  standard error of the mean. Comparative data with cases either having a different genetic diagnosis, or no genetic diagnosis made, are for Oxford patients born between 1993 and 2006 (updated from ref. 13). Data for ERF are not plotted beyond age 9 years because insufficient subjects were available ( $n < 6$ ).

Supplementary Figure 6. Inner canthal separation

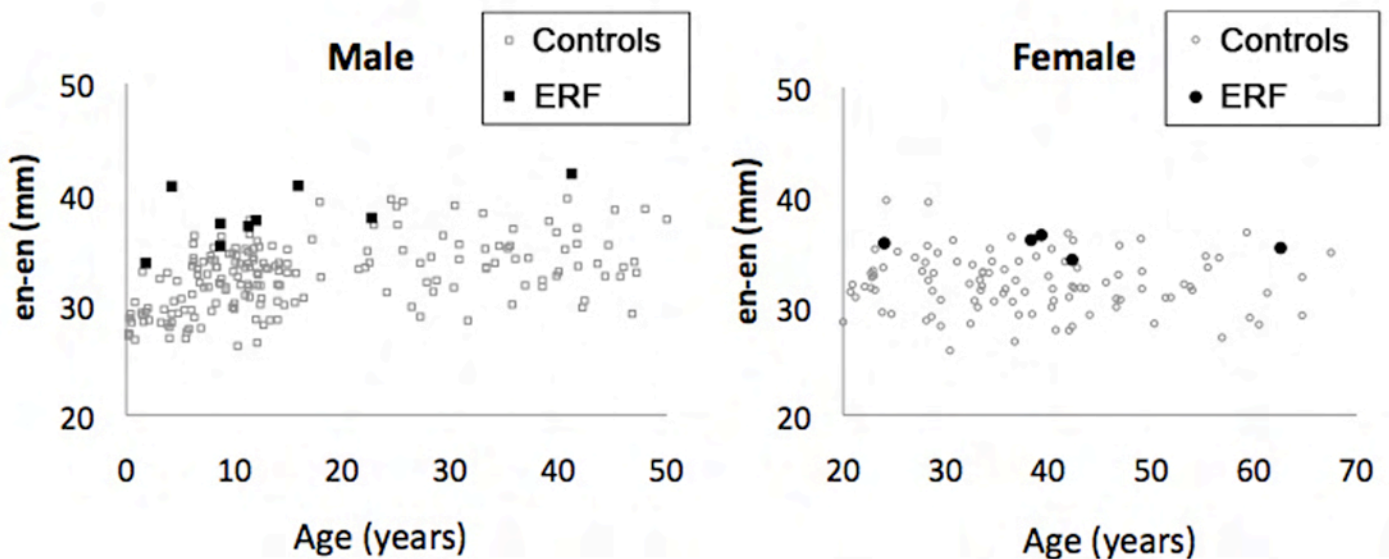

Inner canthal separation (en-en) determined from facial imaging of 14 ERF mutation-positive individuals and 384 controls. Hypertelorism is highly significant in both affected females ( $P < 0.00005$ ) and affected males ( $P < 0.0005$ ).

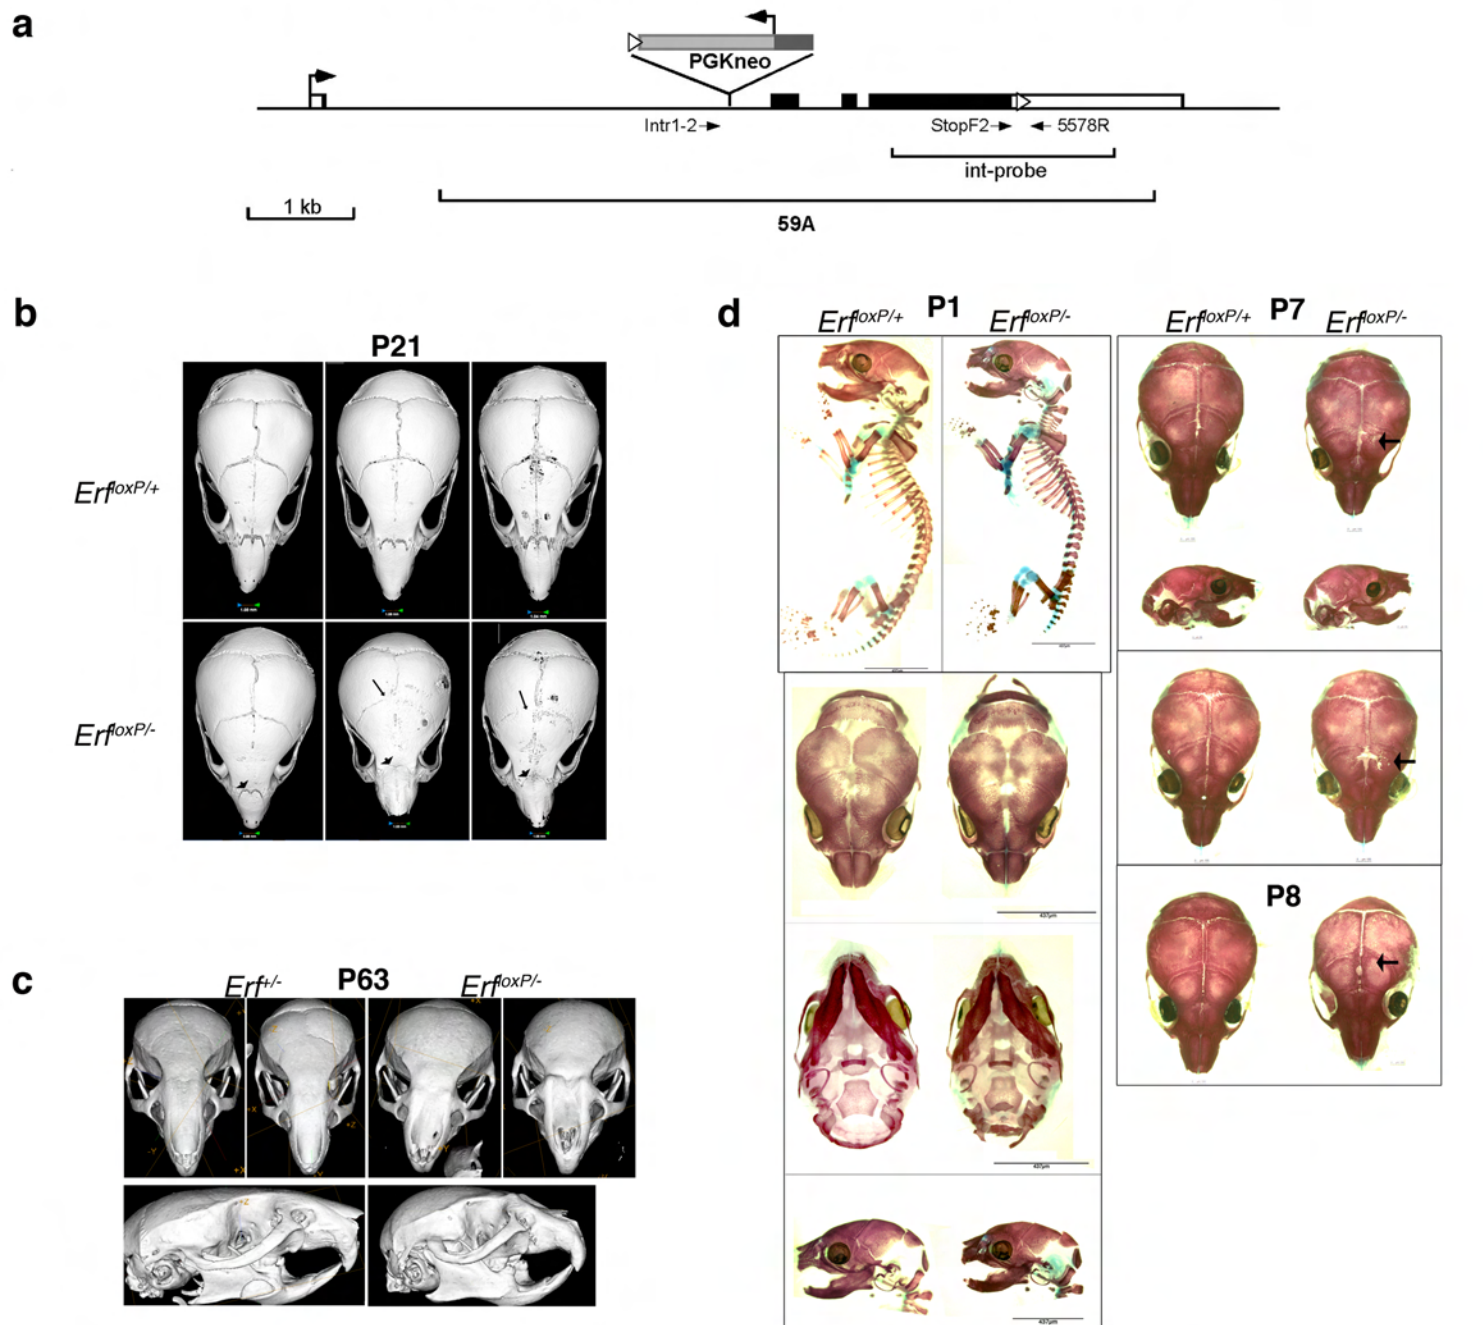

Generation of *Erf<sup>loxP</sup>* allele and skeletal analysis of mutant mice. **a**, Design of targeting vector. Exons and untranslated regions are shown as filled and unfilled rectangles, respectively. *LoxP* sites are denoted by triangles and positions of the *PGKneo-loxP* cassette, diagnostic probes and PCR primers are indicated. **b**, micro-CT scans of postnatal day (P)21 skulls from *Erf<sup>loxP/+</sup>* (top) and *Erf<sup>loxP/-</sup>* (bottom) littermates. Note that coronal craniosynostosis is beginning to be apparent in 2 of 3 *Erf<sup>loxP/-</sup>* animals (arrows). The nasal bones (arrowheads) are already abnormal in all three *Erf<sup>loxP/-</sup>* animals, associated with simplified morphology of the frontonasal suture. **c**, micro-CT scans of P63 skulls from 2 *Erf<sup>+/+</sup>* and 2 *Erf<sup>loxP/-</sup>* littermates (3 of these mice are also illustrated with different views in **Fig. 3b-f**). Top, frontal views of all four mice (*Erf<sup>+/+</sup>* on left not shown in **Fig. 3**). Note twisted broad snouts and telorbitism of *Erf<sup>loxP/-</sup>* mutants. Bottom, side views of 2 mice not shown in **Fig. 3e, f**. **d**, Representative Alizarin red/Alcian blue-stained preparations at P1 (left) and P7/8 (right). At P1 note smaller but proportionate skeleton of *Erf<sup>loxP/-</sup>* animal compared with *Erf<sup>loxP/+</sup>* littermate (top; whole skeletons are composite images). No craniosynostosis is evident at this stage; 5 *Erf<sup>loxP/-</sup>* and 3 *Erf<sup>loxP/+</sup>* were examined. By P7, skulls of *Erf<sup>loxP/-</sup>* animals are noticeably shorter and domed but craniosynostosis is not evident; in addition most *Erf<sup>loxP/-</sup>* mutants showed an irregular margin of the medial part of frontal bone with reduced mineralization (arrows). Eight *Erf<sup>loxP/-</sup>* and 11 *Erf<sup>loxP/+</sup>* were examined.

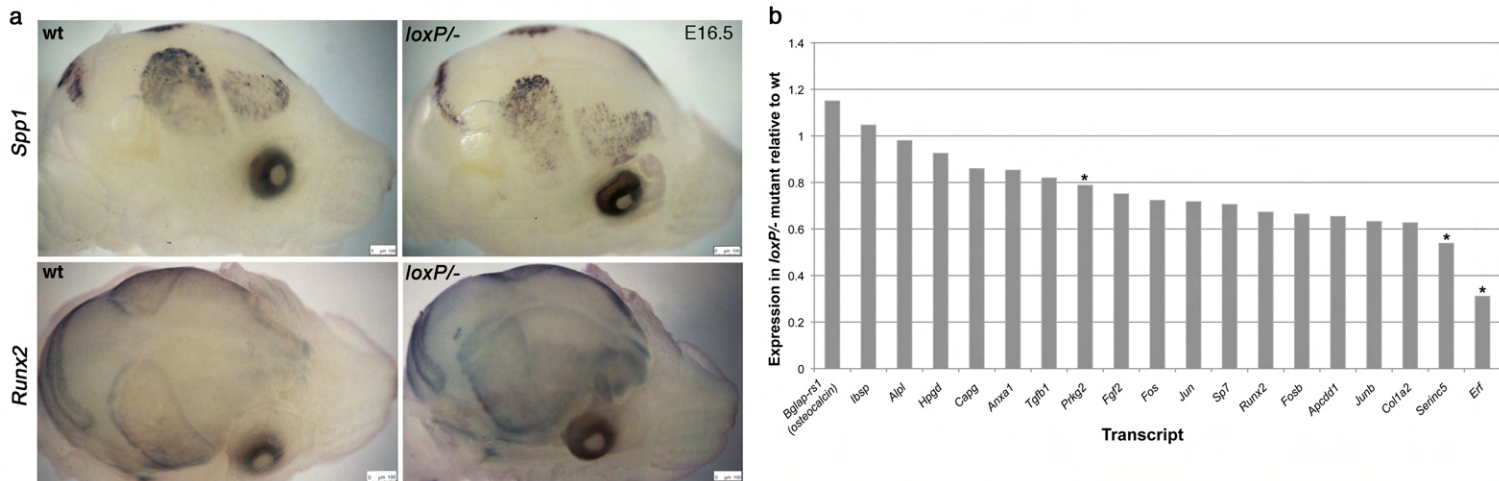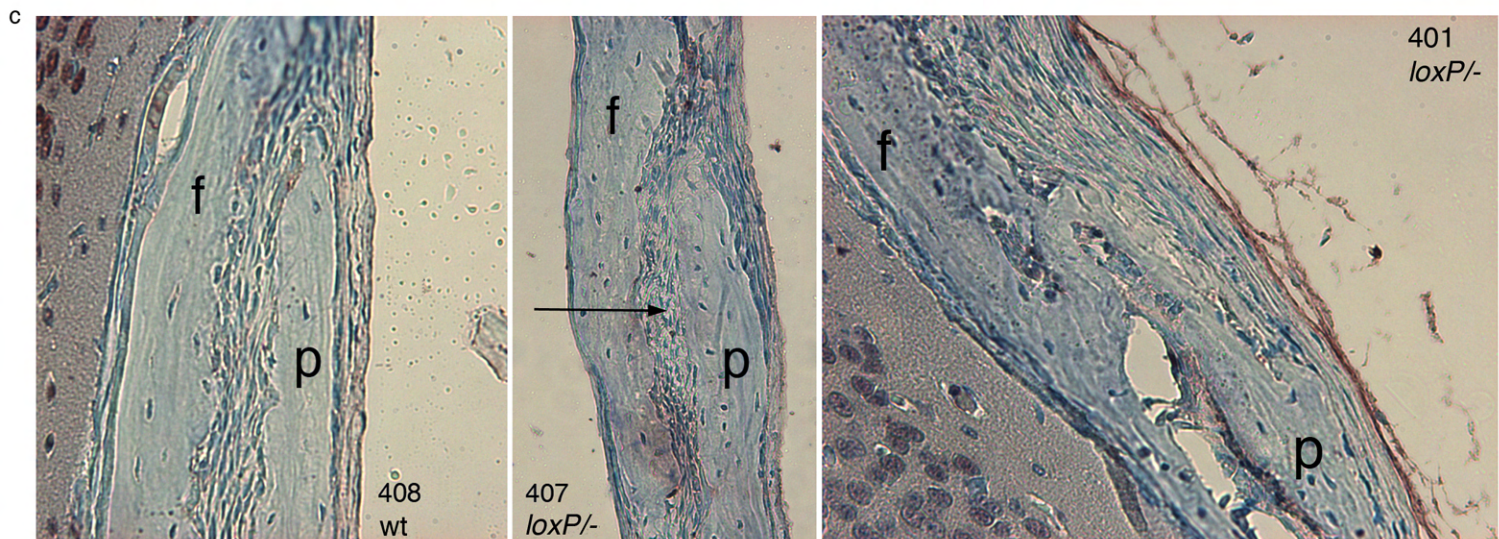

**a**, Whole mount RNA *in situ* hybridization showing expression of *osteopontin* (*Spp1*) and *Runx2* in calvaria of representative E16.5 wildtype (wt) and *Erf*<sup>*loxP*<sup>-/-</sup></sup> embryos. No consistent differences in expression for a given gene were detected between wt and mutant embryos. **b**, Real time RT-PCR analysis of *Erf* and 18 osteogenic marker transcripts in dissected E16.5 calvaria. Data are based on comparison of wild type ( $n = 5$ ) and *Erf*<sup>*loxP*<sup>-/-</sup></sup> ( $n = 4$ ) mice from two litters. The average ratio of expression in the mutants to the wild types is shown, asterisks indicate differences significant at  $P < 0.05$  (*t*-test). **c**, Representative sagittal sections through the coronal suture of P14 littermates 408 (wt), 407 and 401 (both *Erf*<sup>*loxP*<sup>-/-</sup></sup>), stained with a RUNX2 antibody and counterstained with Haematoxylin. The coronal suture is patent in *Erf*<sup>*loxP*<sup>-/-</sup></sup> mouse 407 (arrow) but fused in *Erf*<sup>*loxP*<sup>-/-</sup></sup> 401. f, frontal bone; p, parietal bone.

# Supplementary Figure 9. Analysis of ChIP-Seq data

**a**

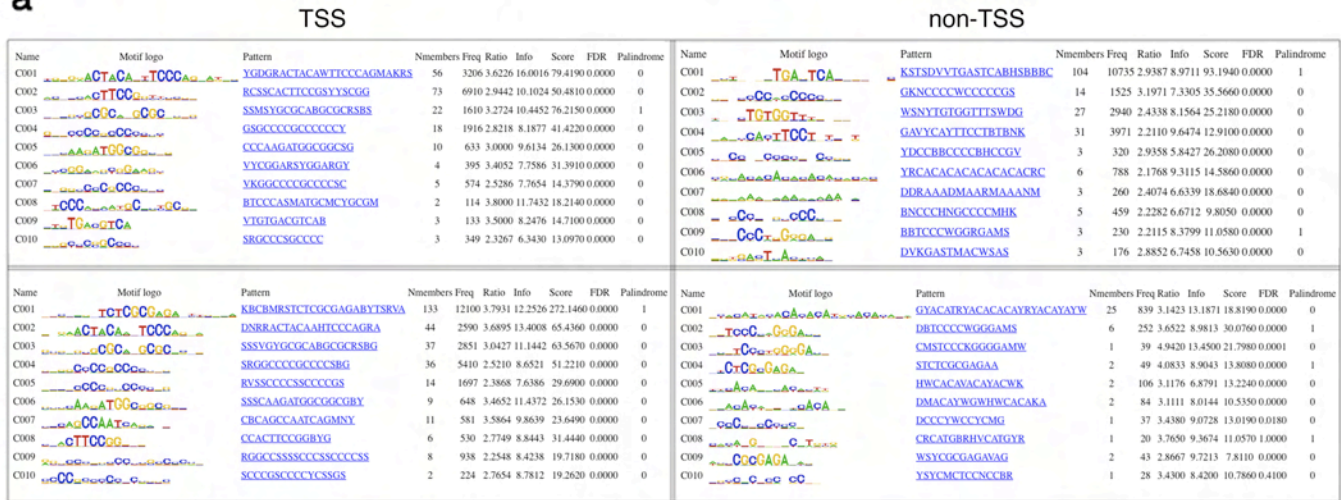

Note: Frequency of clusters of motifs = sum of frequencies of members

>3

<3

**b**

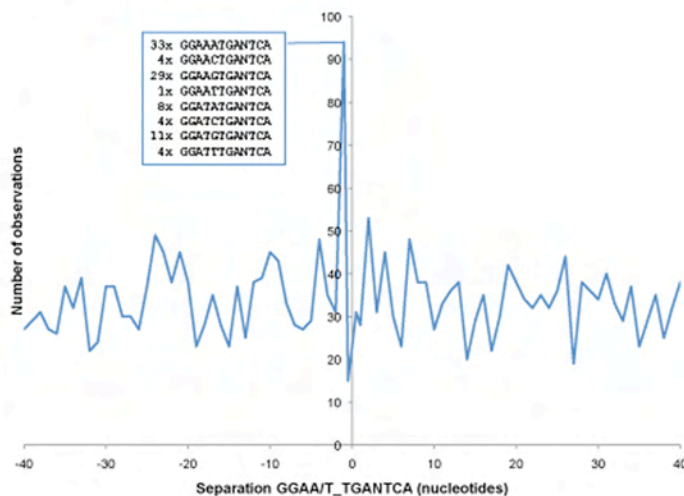

**c**

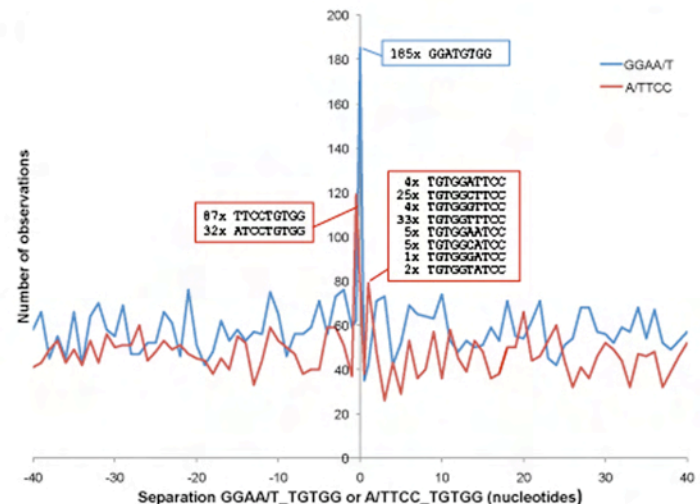

**a**, MEME analysis<sup>27</sup> of sequence under ChIP-Seq peaks within 1 kb of transcription start sites (TSS), and with a  $-FCS/+FCS$  ratio of greater or less than 3. **b,c**, plots showing number of sequences observed, at particular separations, of closely spaced ETS and palindromic AP1 binding sites (**b**) and ETS and RUNX sites (**c**), in peaks defined as non-TSS and FCS-/FCS+ >3. The x-axis shows the number of nucleotides separating the two motifs, except that in both plots, abutting motifs are plotted at -0.5 and +0.5, and in plot **c**, the specific overlapping motif GGATGTGG is plotted at 0. Sequence compositions of peaks representing closely adjacent motifs are shown individually. Owing to the palindromic nature of the AP1 site only a single plot is shown, whereas for the ETS-RUNX pairing the two possible orientations are shown separately.
